# Supplementary material
Source: PubMed Central journal article supplement (PMC3049374)
Supplement: JCI45523sd.pdf [file JCI45523sd.pdf]

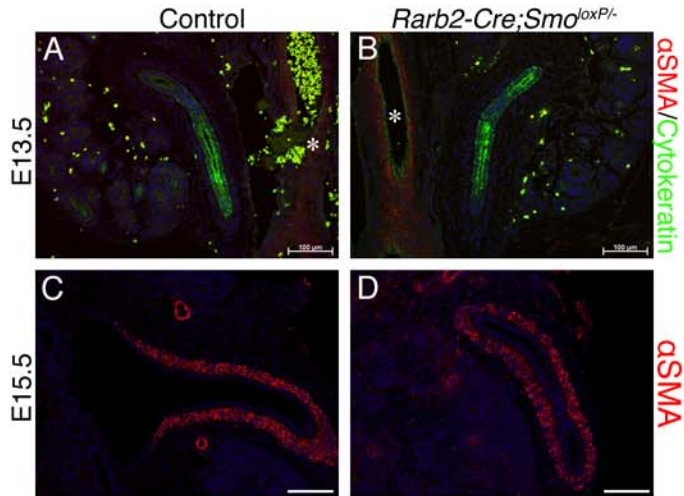

### Supp Figure 1

*Smo* deficient embryos demonstrate normal ureter smooth muscle differentiation. Ureter smooth muscle differentiation is comparable between control and *Rarb2-Cre;Smo<sup>loxP/-</sup>* mutants at E13.5 (A,B) and E15.5 (C,D). \* = Descending aorta. Scale bars: 100μm.

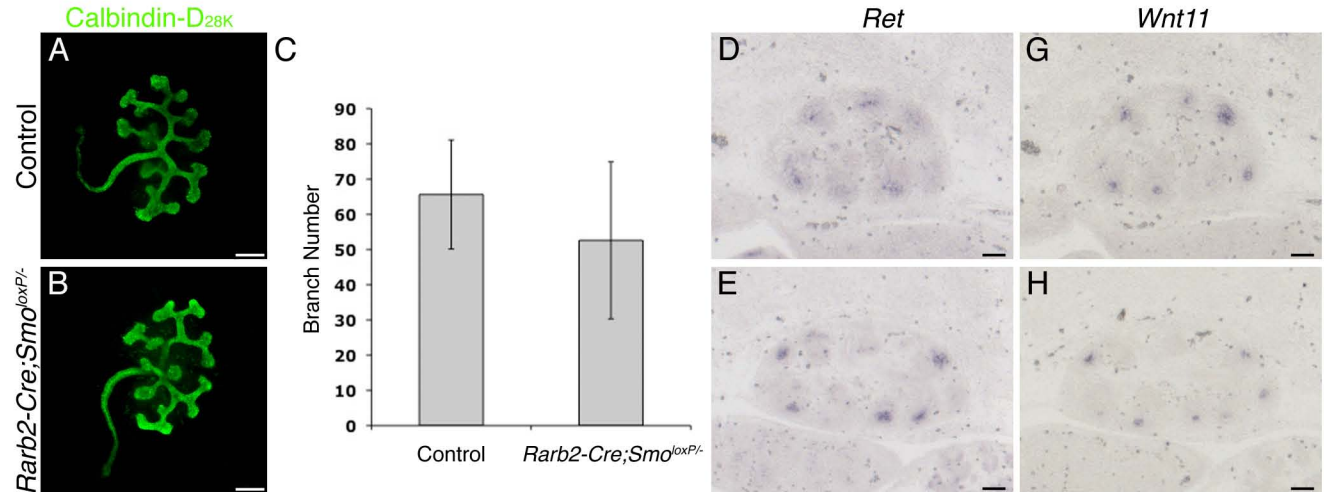

**Supp Figure 2**

Normal early ureteric branching morphogenesis in *Smo* deficient embryos. *Rarb2-Cre;Smo<sup>loxP/-</sup>* kidneys exhibit normal ureteric patterning (A,B) and comparable branch number (C) to control kidneys at E12.5. Expression of ureteric bud tip markers critical for ureteric branching morphogenesis, *Ret* (D,E) and *Wnt11* (G,H) in *Rarb2-Cre;Smo<sup>loxP/-</sup>* kidneys is comparable to control kidneys at E13.5. Scale bars: 200µm.

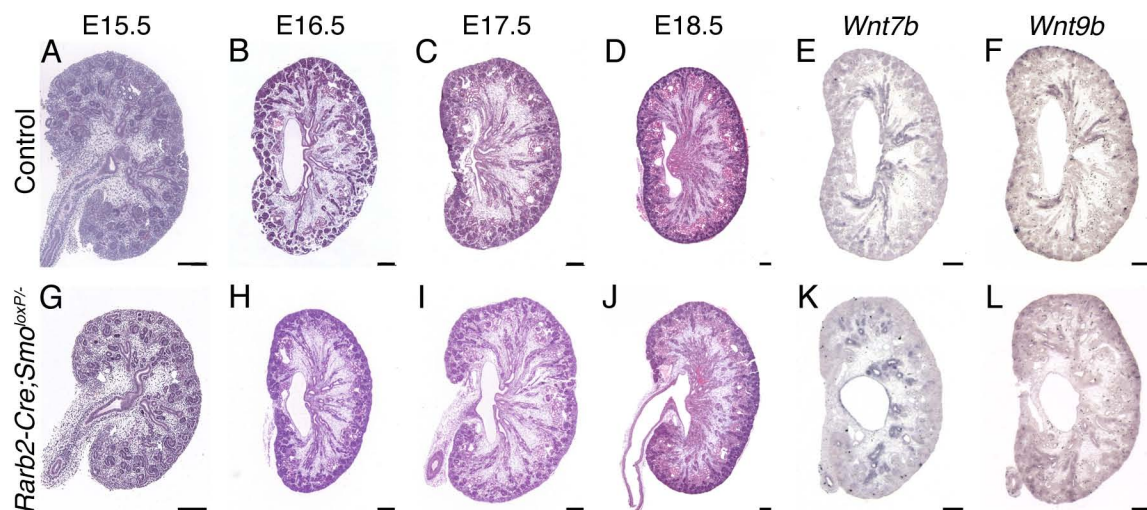

### Supp Figure 3

Renal medulla development and differentiation is normal in *Smo* deficient kidneys. (A-D,G-J) Histological analysis of renal medulla patterning and developing from E15.5-E18.5 is comparable between control and *Rarb2-Cre;Smo<sup>loxP/-</sup>* kidneys. Expression of medullary collecting duct markers *Wnt7b* (E,K) and *Wnt9b* (F,L) is comparable between genotypes. Scale bars: 200 $\mu$ m.

## JCI Manuscript 45523 (Cain et al.)

### Supp Movie 1

Control ureter peristalsis.

### Supp Movie 2

*Rarb2-Cre;Smo<sup>loxP/-</sup>* ureter peristalsis.

### Supp Movie 3

Control ureter peristalsis.

### Supp Movie 4

*Gli2* homozygous null ureter peristalsis.

### Supp Movie 5

*Gli3* homozygous null ureter peristalsis.

### Supp Movie 6

*Gli3<sup>699/\_699</sup>* ureter peristalsis.

### Supp Movie 7

*Gli3<sup>699/\_699</sup>* ureter peristalsis.

### Supp Movie 8

*Rarb2-Cre;Smo<sup>loxP/-</sup>;Gli3<sup>XtJ/XtJ</sup>* ureter peristalsis.
